# Supplementary material for: Vacuolar H+-ATPase and Na+/K+-ATPase energize Na+ uptake mechanisms in the nuchal organ of the hyperregulating freshwater crustacean Daphnia magna
Source: Oxford University Press journal article supplement (doi:10.1242/jeb.242205), 2021-05-11

## Supplementary material

Figure S1. Na<sup>+</sup> influx in response to A) 1% DMSO and B) 0.5% ethanol. In each panel, the open bar represents the control Na<sup>+</sup> influx for neonates bathed in dechlorinated Hamilton tap water. The indicated concentration of the inhibitor was then added at 3 minutes and fluxes were measured at 6, 9, 12, 15 minutes. Data passed normality tests and were analysed using one-way RM ANOVA and Dunnet's post-hoc test. Asterisks denote significant ( $P < 0.05$ ) differences between control ( $t = 3$  min; open bars) and experimental ( $t = 6 - 15$  min; closed bars) values. Numbers of animals indicated in brackets in the control bar.

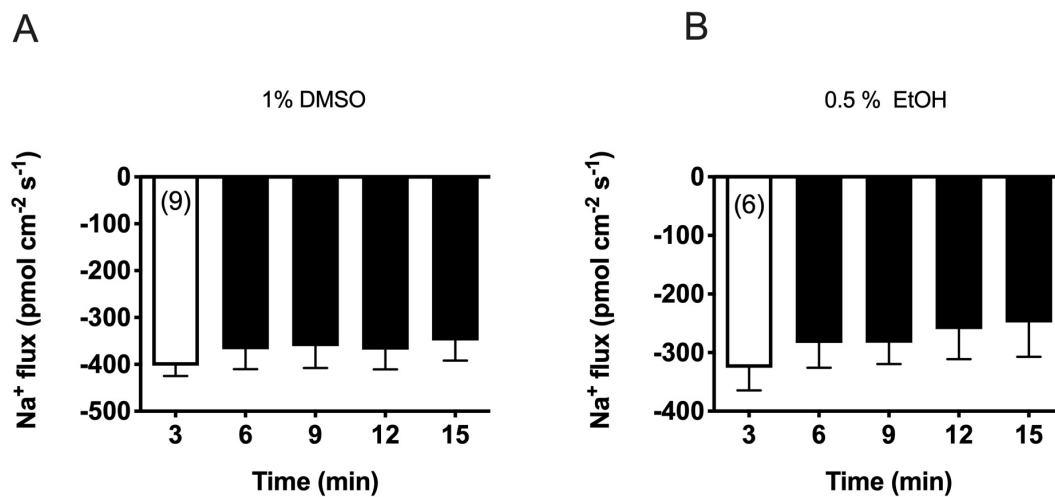

Supplement: jeb242205supp.pdf [file jeb242205supp.pdf]
